# Supplementary material
Source: Springer Nature journal article supplement (https://www.springermedizin.de/resource/supplementary/12885_2011_2968_MOESM6_ESM.pdf/9462414)

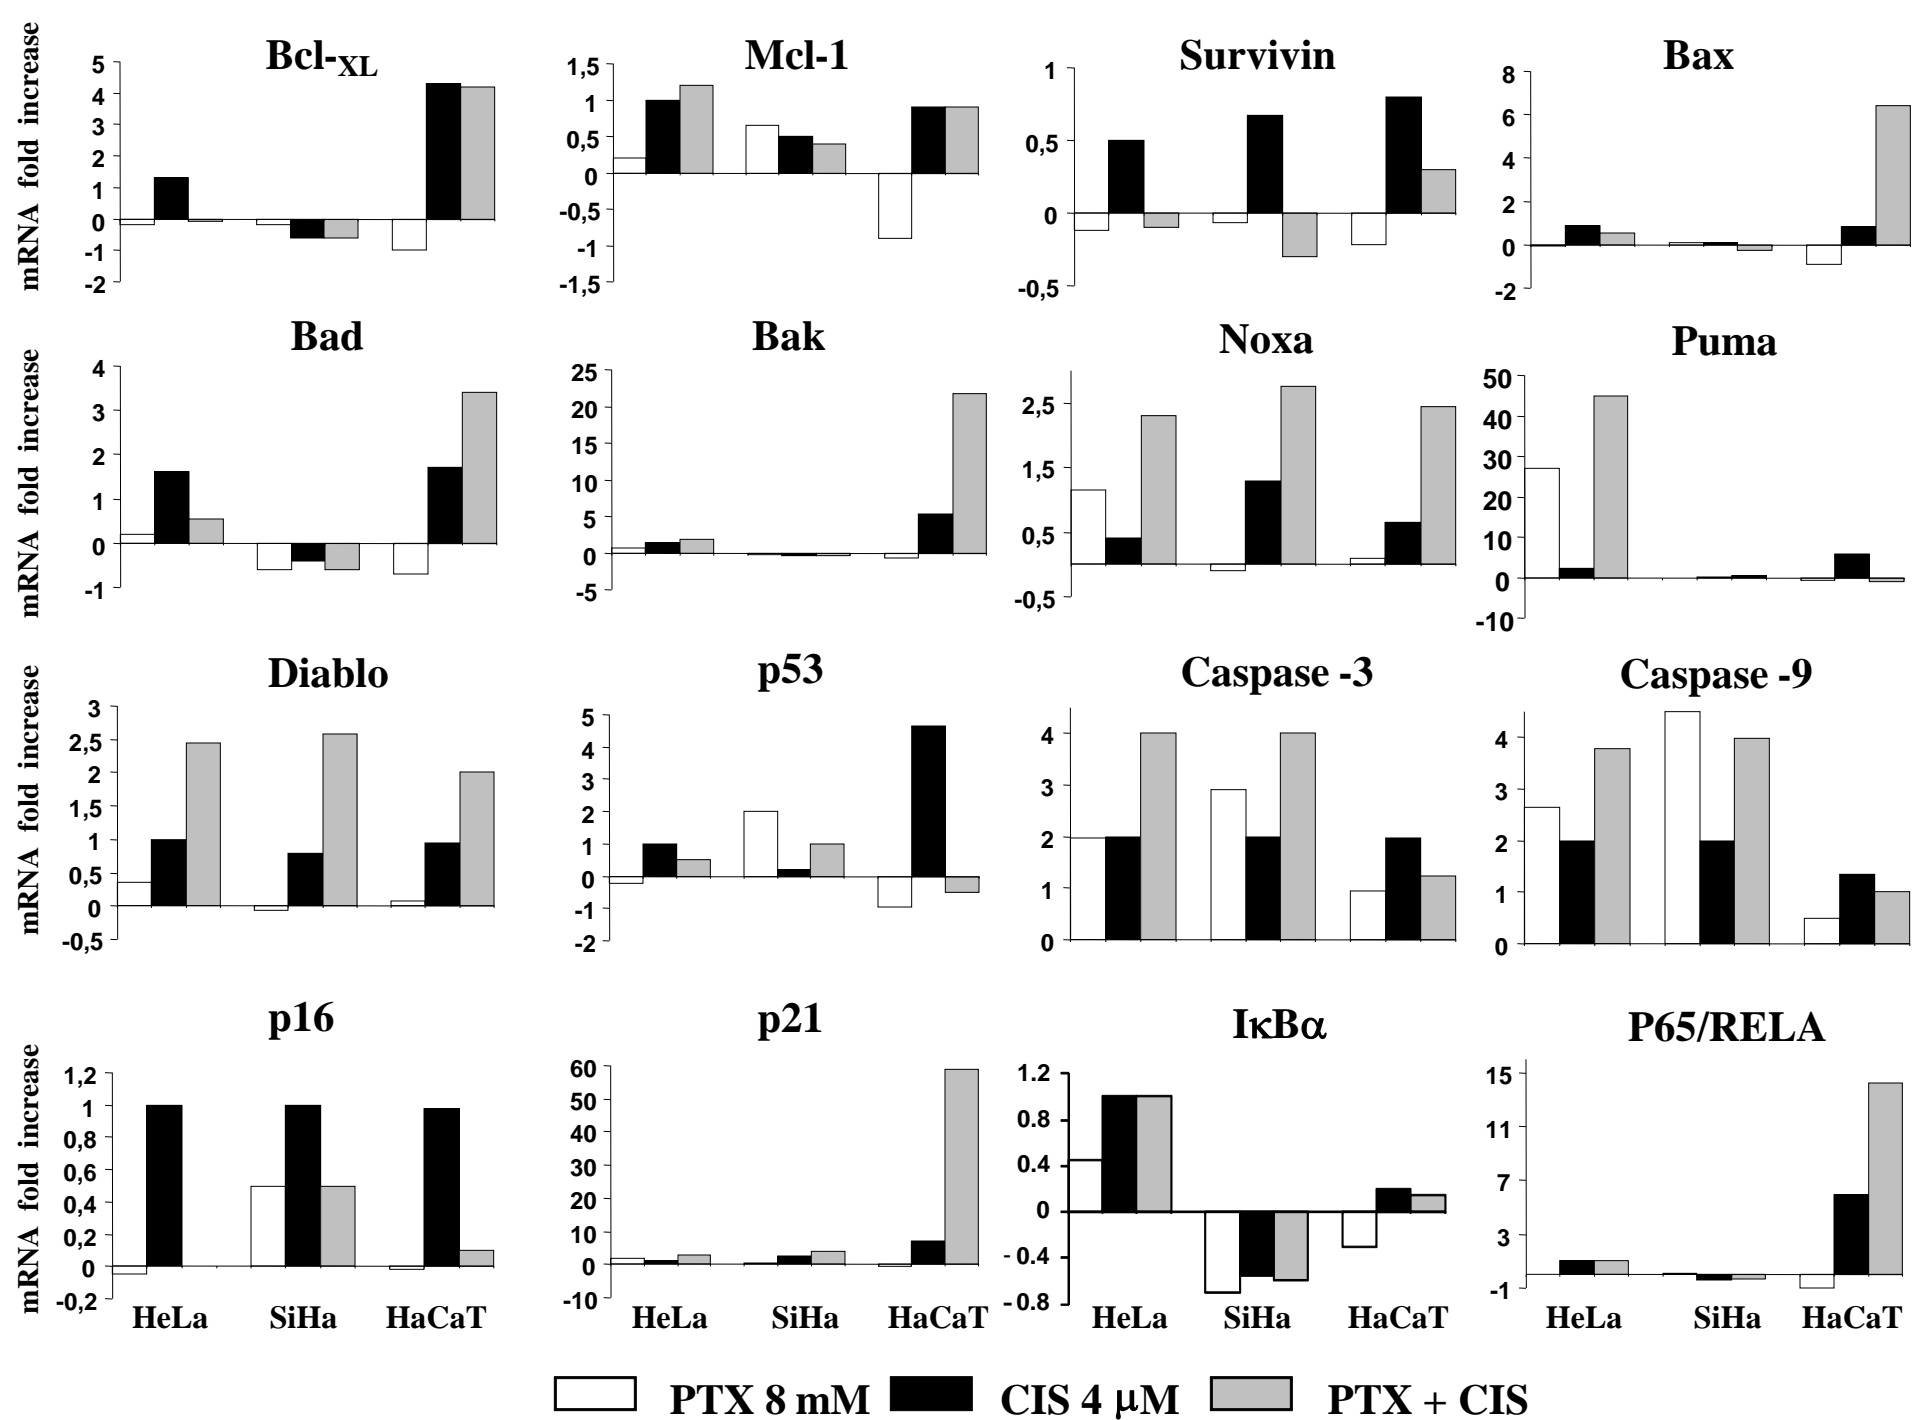

Supplement: MOESM6 [file 9462414]
